# Supplementary material for: Interfering microRNA-410 attenuates atherosclerosis via the HDAC1/KLF5/IKBα/NF-κB axis
Source: PubMed Central journal article supplement — Mol Ther Nucleic Acids. 2021 Mar 13;24:646–57. doi: 10.1016/j.omtn.2021.03.009 (PMC8076652; doi:10.1016/j.omtn.2021.03.009), 2021-03-13
Supplement: mmc1.pdf [file mmc1.pdf]

**OMTN, Volume 24**

**Supplemental information**

**Interfering microRNA-410  
attenuates atherosclerosis  
via the HDAC1/KLF5/IKB $\alpha$ /NF- $\kappa$ B axis**

**Shanji Nan, Ying Wang, Chengbi Xu, and Haitao Wang**

**Table S2.** Sequence of HDAC1 shRNAs and negative control

| Gene             | Sequence (5'-3')      |
|------------------|-----------------------|
| sh-HDAC1-1       | GCTCAATTACGGTCTCTATCG |
| sh-HDAC1-2       | GCATTCGTCCTGACAACATGT |
| Negative control | TTCTCCGAACGTGTCACGTTT |

Note: shRNA, short heparin RNA; HDAC1, Histone deacetylase 1.

**Table S3.** Primer sequence for RT-qPCR

| Targets        | Species | Primer sequence                                                        |
|----------------|---------|------------------------------------------------------------------------|
| miR-410        | Mouse   | F: 5'-GCGCCAATATAACACAGATGGCCTGT-3'<br>R: 5'-GTGCAGGGTCCGAGGT-3'       |
| miR-410        | Human   | F: 5'-AGTTG TTCACCACCTTCTCCAC-3'<br>R: 5'-TATCGTTGTACTCCAGTCCAAGTC-3'  |
| HDAC1          | Mouse   | F: 5'-TGAAGCCTCACCGAATCCG-3'<br>R: 5'-GGGCGAATAGAACGCAGGA-3'           |
| HDAC1          | Human   | F: 5'-AGCCAAGAGAGTCAAAACAGA-3'<br>R: 5'-GGTCATT CAGGCCAACT-3'          |
| KLF5           | Human   | F: 5'-CCTGGTCCAGACAAGATGTGA-3'<br>R: 5'-GAACTGGTCTACGACTGAGGC-3'       |
| IKB $\alpha$   | Human   | F: 5'-CTCCGAGACTTTCGAGGAAATAC-3'<br>R: 5'-GCCATTGTAGTTGGTAGCCTTCA-3'   |
| U6             | Human   | F: 5'-GCTTCGGCAGCACATATACTAAAAT-3'<br>R: 5'-CGCTTCACGAATTTGCGTGTCAT-3' |
| U6             | Mouse   | F: 5'-GCTTCGGCAGCACATATACTAAAAT-3'<br>R: 5'-CGCTTCACGAATTTGCGTGTCAT-3' |
| $\beta$ -actin | Human   | F: 5'-AAGAGCTACGAGCTGCCTGA-3'<br>R: 5'-GGCAGTGATCTCCTTCTGCA-3'         |
| $\beta$ -actin | Mouse   | F: 5'-GTGACGTTGACATCCGTAAAGA-3'<br>R: 5'-GCCGGACTCATCGTACTCC-3'        |

Note: RT-qPCR, Reverse transcription quantitative polymerase chain reaction; miR-410, microRNA-410; HDAC1, Histone deacetylase 1; KLF5, Kruppel Like Factor 5; IKB $\alpha$ , nuclear factor of kappa light polypeptide gene enhancer in B-cells inhibitor alpha; F, forward; R, reverse.
